# Supplementary material
Source: PubMed Central journal article supplement (PMC3014172)
Supplement: supp_85_1_21__1.pdf [file supp_85_1_21__1.pdf]

1 **Supplemental Figures & Legends**

2

3 **Supplemental Figure 1.** (a) Image of 3T3 cell infected with MPX and stained with FITC-  
4 phalloidin to visualize actin (green), pY mAb (red) and DAPI to visualize DNA (blue). (b-i)  
5 Images of actin tails on 3T3 cells infected with VarV strain BSH or SLN stained with FITC-  
6 phalloidin (green) and antibodies against cellular or viral proteins (red): (b) B5R mAb, (c) Nck  
7 mAb, (d) Grb2 pAb, (e) Src pAb, (f) Fyn mAb, (g) Yes mAb, (h) Abl1 mAb, (i) Abl2 mAb. Scale  
8 bars represent 5  $\mu\text{m}$  (a) and 1  $\mu\text{m}$  (b-i).

9

10

11

12

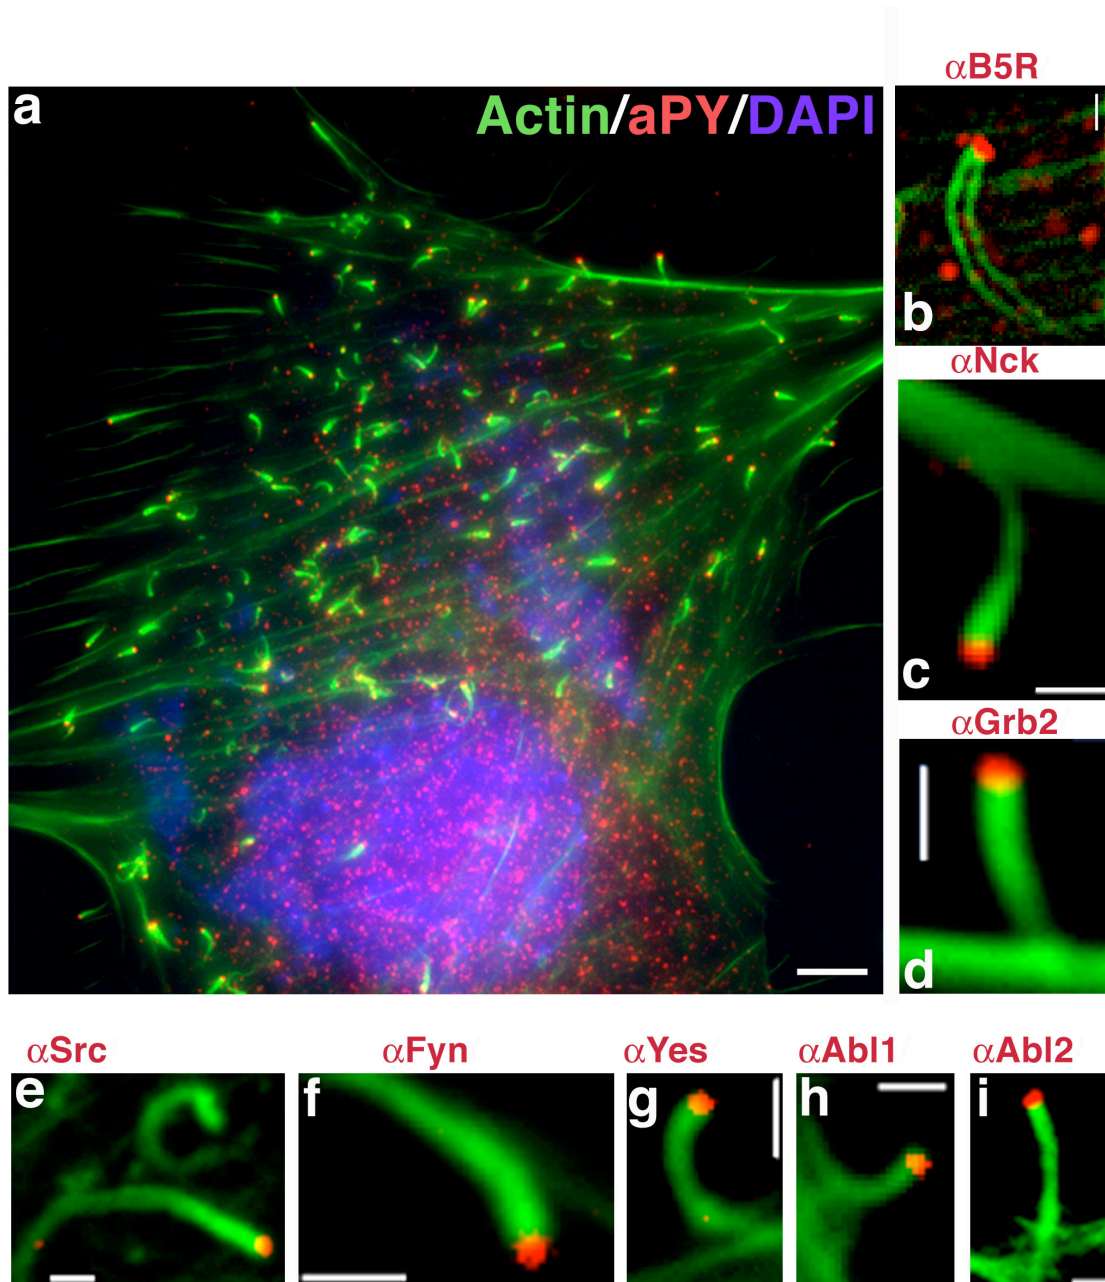

12 **Supplemental Figure 2. Sprycel blocks VacV actin tails.** (a–b) Images of 3T3 cells left  
13 untreated (a) or treated with 10  $\mu$ M Sprycel (BMS354825) (b) and infected with VacV strain  
14 B5R-GFP WR for 18 h, fixed, and stained with DAPI (blue), and Cy3-phalloidin (red) to  
15 recognize actin. GFP is shown in green. Scale bars represent 5  $\mu$ m. Bar graph indicates  
16 average number of GFP positive actin tails per cell in the presence or absence of 10  $\mu$ M Sprycel  
17 (25 cells per condition).

18

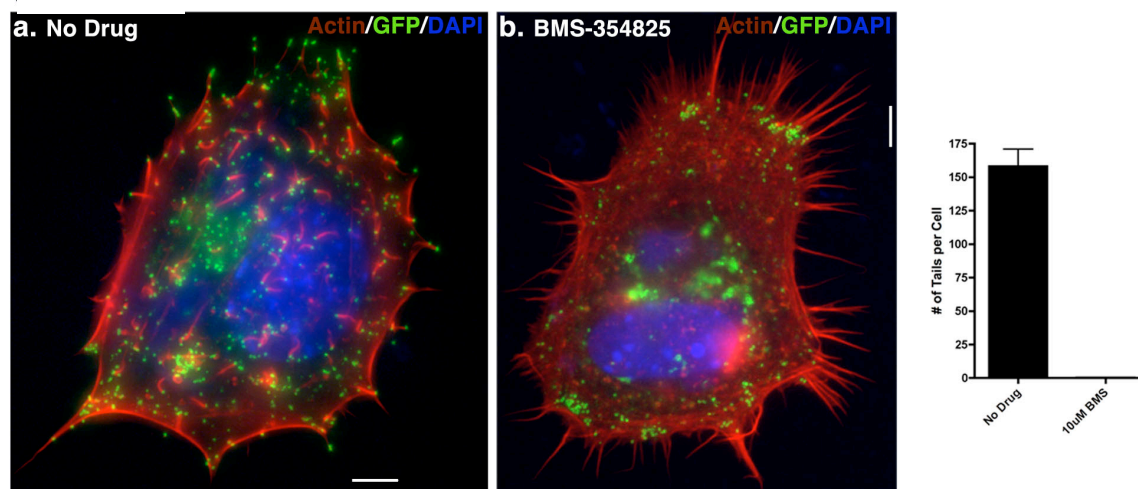

18 **Supplemental Figure 3. VacV comet assay.** BSC-40 cells were infected with VacV strain WR  
19 (a) or VacV strain IHD-J (b). Cells were left untreated or treated with PD-166326, BMS-354825,  
20 imatinib mesylate (STI-571), or nilotinib mesylate (AMN-107), each at 10  $\mu$ M, 1  $\mu$ M, or 100 nM.  
21 Drugs were added 1 h after infection. Cells were incubated for 2 (VacV) or 3 (MPX) d, fixed, and  
22 stained with VarV pAb or VacV L1R mAb to recognize infected cells.

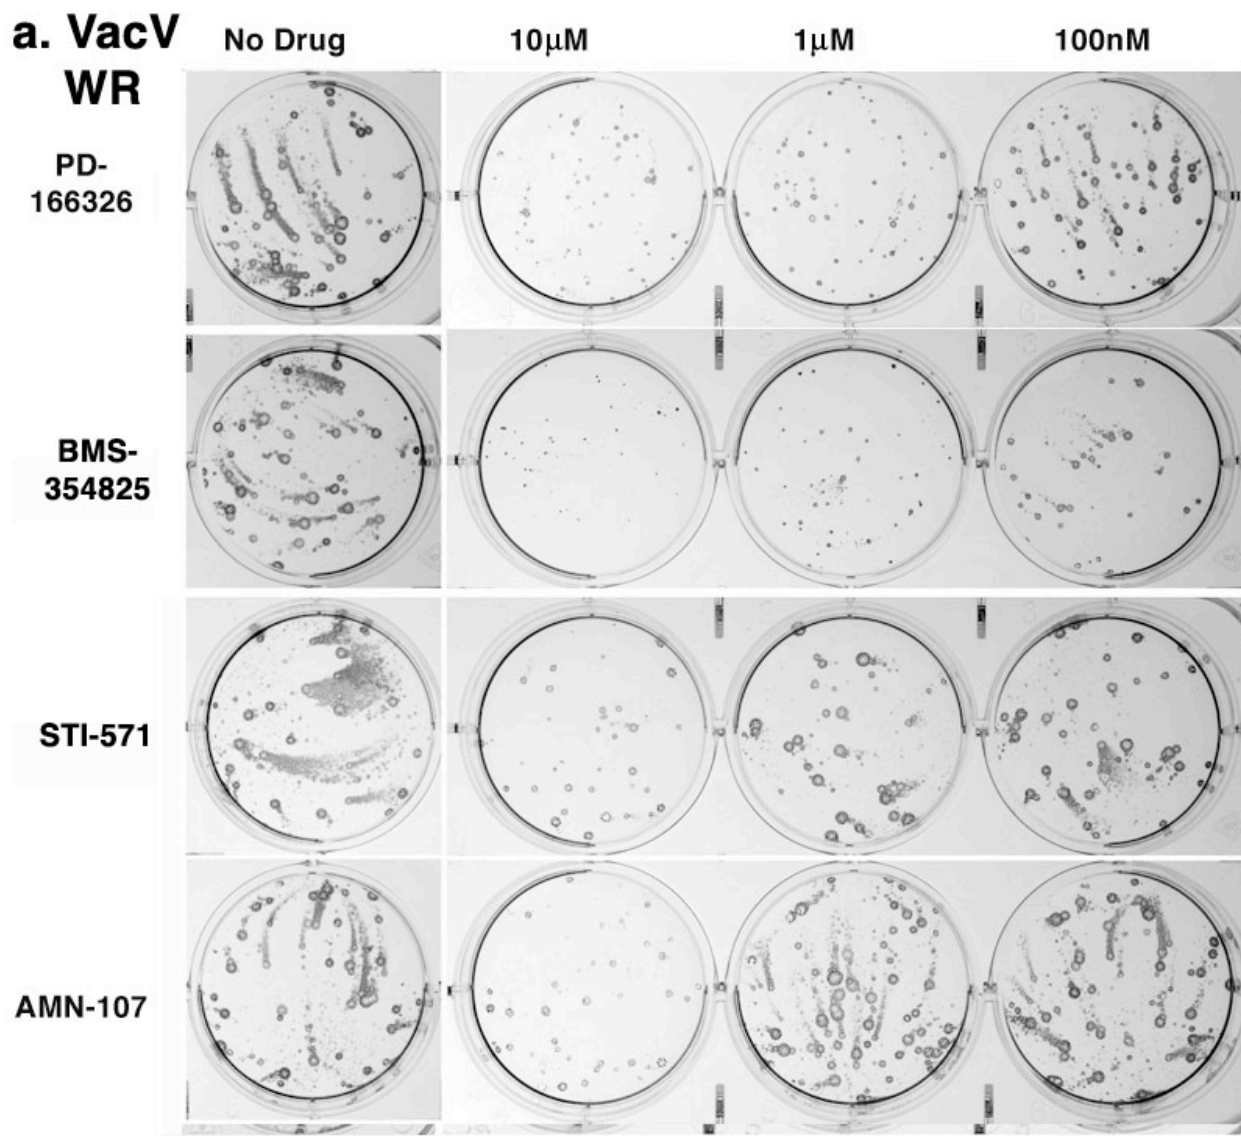

23

**b. VacV  
IHD-J**

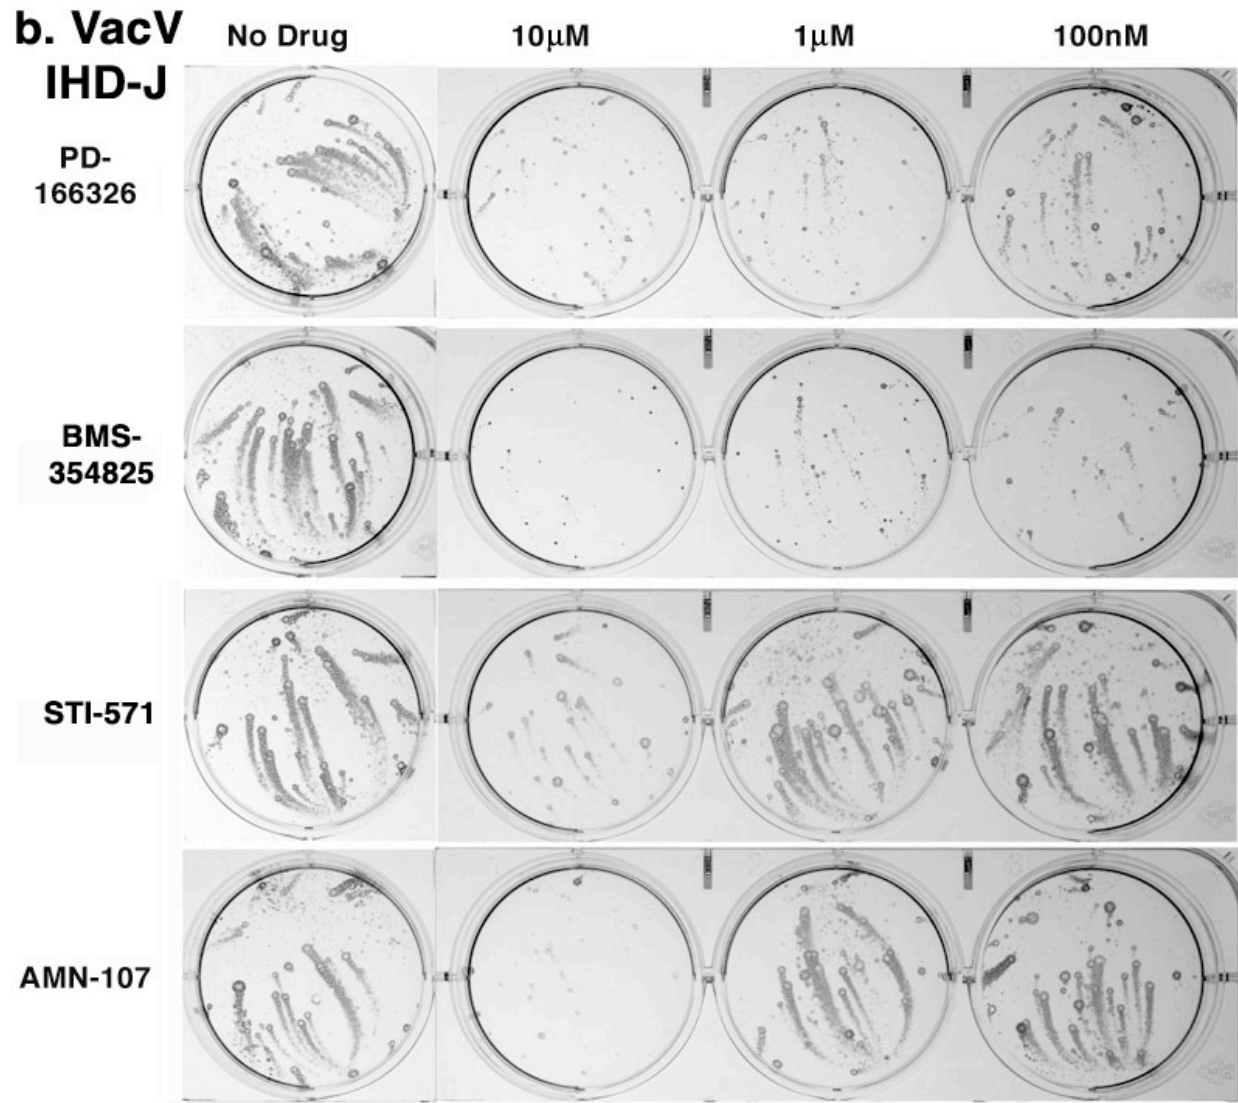

24  
25  
26  
27



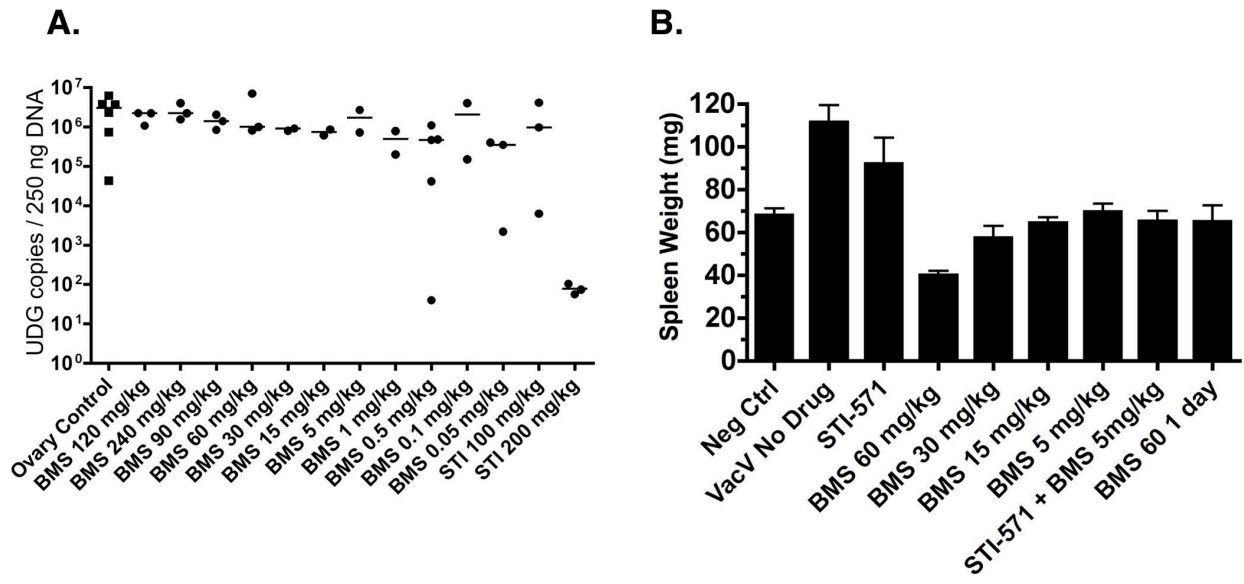

27 **Supplemental Figure 4. BMS-354825 *In Vivo*.** Quantification of viral genomes and spleen  
 28 weight from VacV infected mice. (a) Mice received 0.05 to 240 mg/kg/d dasatinib (BMS-354825)  
 29 or imatinib mesylate (STI-571; 100-200mg/kg/day) via osmotic pump and were infected IP with  
 30 10<sup>4</sup> PFU VacV IHD-J. Total number of viral genome copies was determined 4 d post infection.  
 31 (b) Spleen weights were determined for mice left untreated or treated with various drugs.
